# Supplementary material
Source: MDPI journal article supplement (https://www.mdpi.com/2073-4344/12/2/144)
Supplement: s1 [file s1 › catalysts-1538139-supplementary.pdf]

# Molecular insights into adsorption and diffusion mechanism of n-hexane in MFI zeolites with different Si-to-Al ratio and counterions

Jian Zheng<sup>1,2</sup>, Le Huang<sup>2</sup>, Panpeng Wei<sup>1,2</sup>, Qiang Li<sup>2</sup>, Xiaolei Fan<sup>3\*</sup>, Yucai Qin<sup>2\*</sup>, Lijuan Song<sup>1,2\*</sup>

<sup>1</sup> College of Chemistry & Chemical Engineering, China University of Petroleum (East China),  
Qingdao 266555, China

<sup>2</sup> Key Laboratory of Petrochemical Catalytic Science and Technology, Liaoning Petrochemical  
University, Fushun 113001, China

<sup>3</sup> Department of Chemical Engineering, The University of Manchester, Oxford Road, Manchester,  
M13 9PL, UK

*\*To whom correspondence should be addressed: lsong56@263.net (L. Song)*

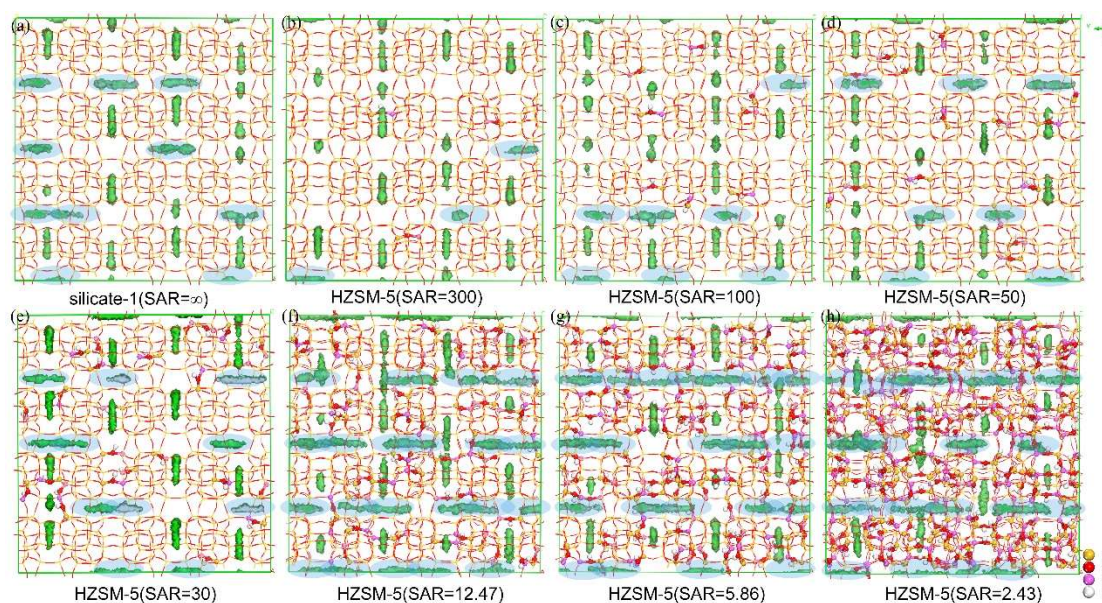

**Figure S1.** Density distribution of n-hexane on silicate-1 (a) and HZSM-5 with different SAR of 300 (b), 100 (c), 50 (d), 30 (e), 12.47 (f), 5.86 (g) and 2.43 (h) at 423 K. The X-axis direction (vertical direction in picture) represents the sinusoidal channels; the Y-axis direction (horizontal direction in picture) represents the straight channels (blue shadow area). The green region represents the lowest-energy, preferred adsorption positions for n-hexane molecules.

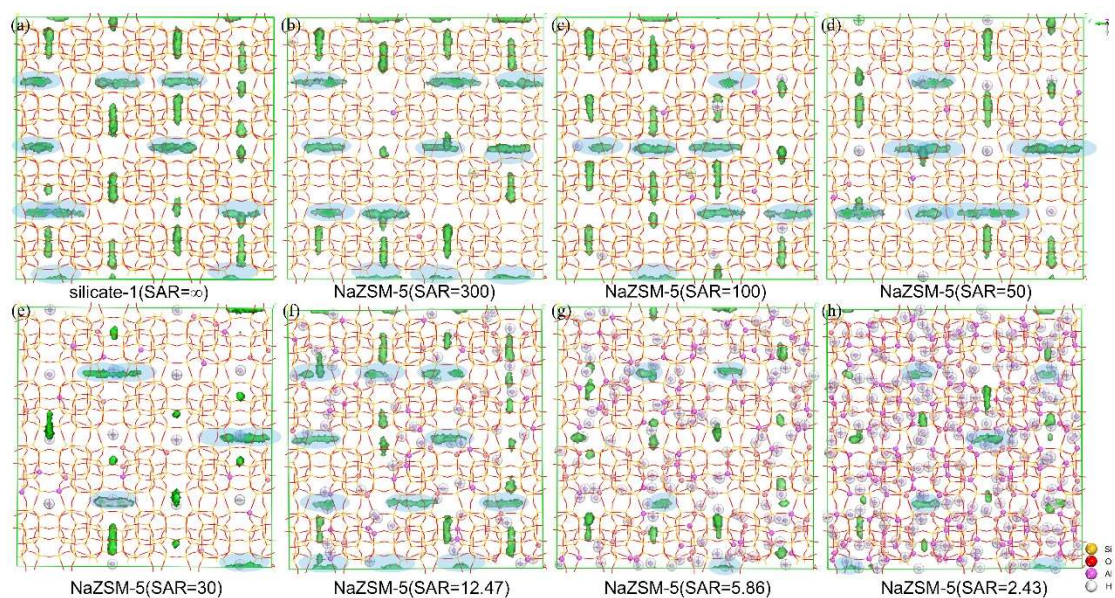

**Figure S2.** Density distribution of n-hexane on silicate-1 (a) and NaZSM-5 with different SAR of 300 (b), 100 (c), 50 (d), 30 (e), 12.47 (f), 5.86 (g) and 2.43 (h) at 423 K. The X-axis direction (vertical direction in picture) represents the sinusoidal channels; the Y-axis direction (horizontal direction in picture) represents the straight channels (blue shadow area). The green region represents the lowest-energy, preferred adsorption positions for n-hexane molecules.

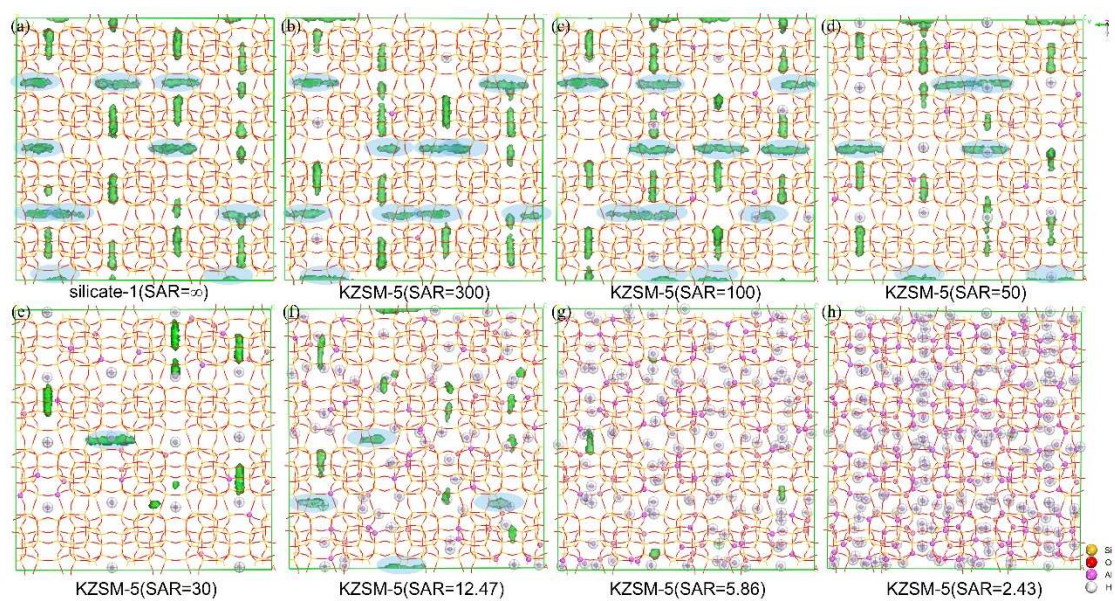

**Figure S3.** Density distribution of n-hexane on silicate-1 (a) and KZSM-5 with different SAR of 300 (b), 100 (c), 50 (d), 30 (e), 12.47 (f), 5.86 (g) and 2.43 (h) at 423 K. The X-axis direction (vertical

direction in picture) represents the sinusoidal channels; the Y-axis direction (horizontal direction in picture) represents the straight channels (blue shadow area). The green region represents the lowest-energy, preferred adsorption positions for n-hexane molecules.

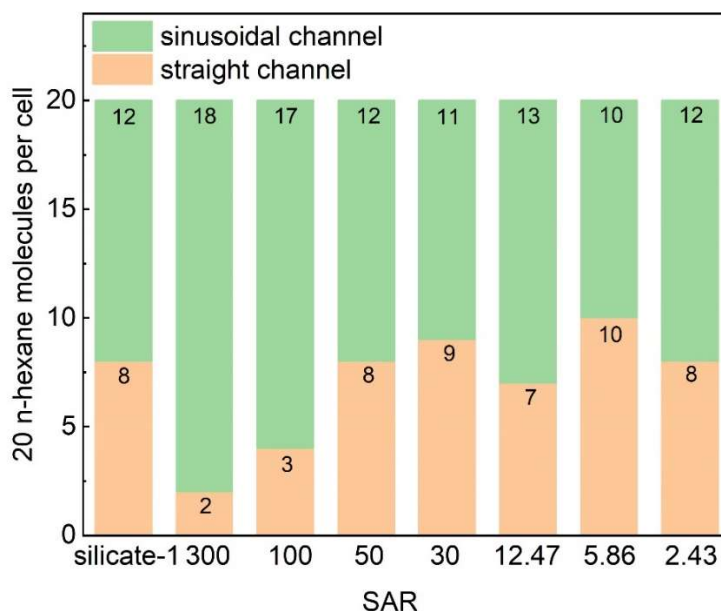

**Figure S4** Number of n-hexane molecules in straight (see yellow rectangle) and sinusoidal (see green rectangle) channels in the HMFI and silicate-1 models used for MD calculations

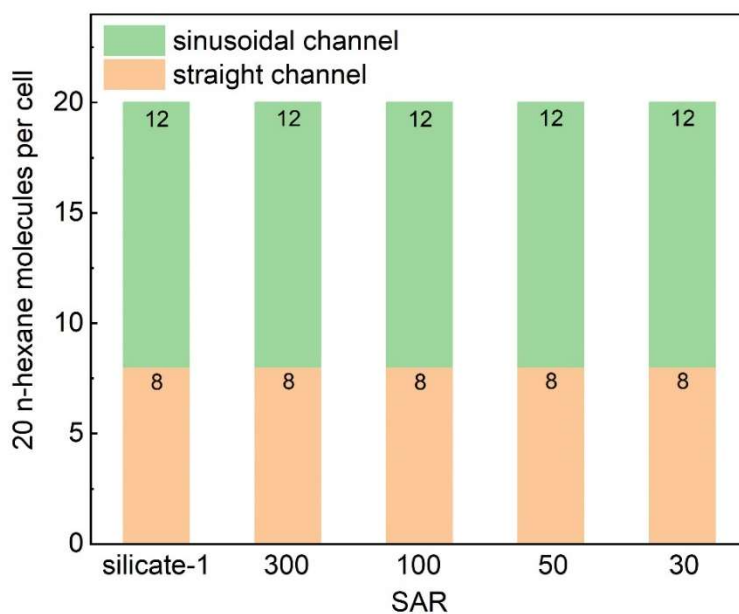

**Figure S5** Number of n-hexane molecules in straight (see yellow rectangle) and sinusoidal (see green rectangle) channels in the NaMFI and silicate-1 models used for MD calculations

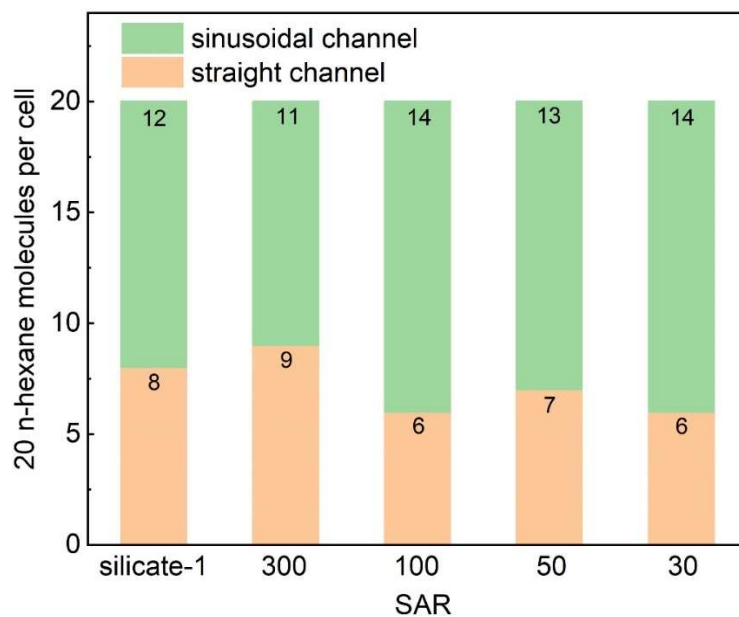

**Figure S6** Number of n-hexane molecules in straight (see yellow rectangle) and sinusoidal (see green rectangle) channels in the KMFI and silicate-1 models used for MD calculations

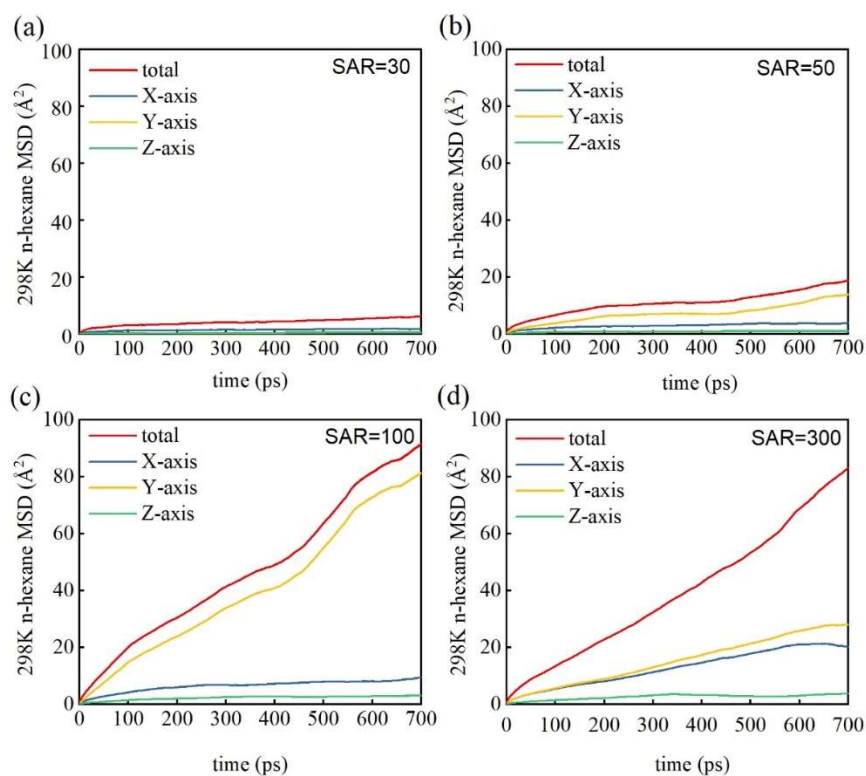

**Figure S7.** MSD of anisotropic diffusion coefficient of n-hexane molecules on NaZSM-5 with different SAR of 300 (d), 100 (c), 50 (b) and 30 (a) at 298 K

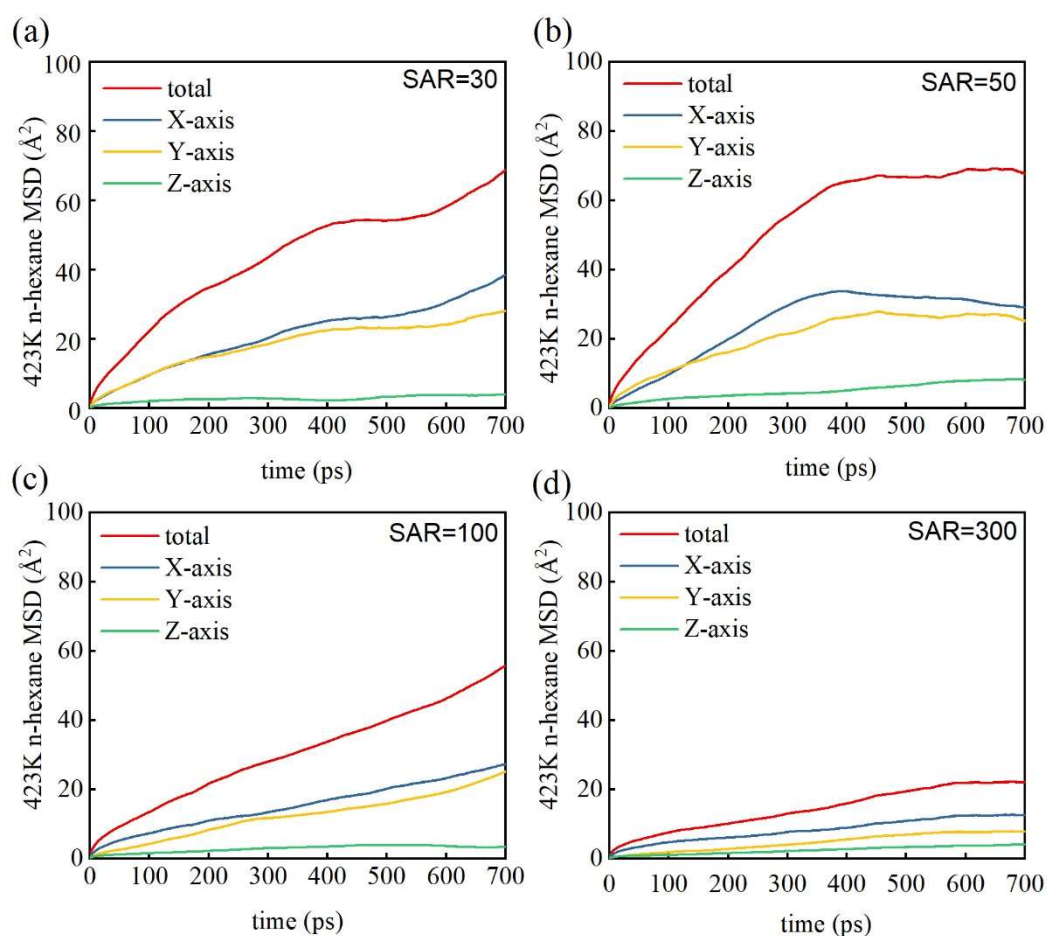

**Figure S8.** MSD of anisotropic diffusion coefficient of n-hexane molecules on NaZSM-5 with different SAR of 300 (d), 100 (c), 50 (b) and 30 (a) at 423 K

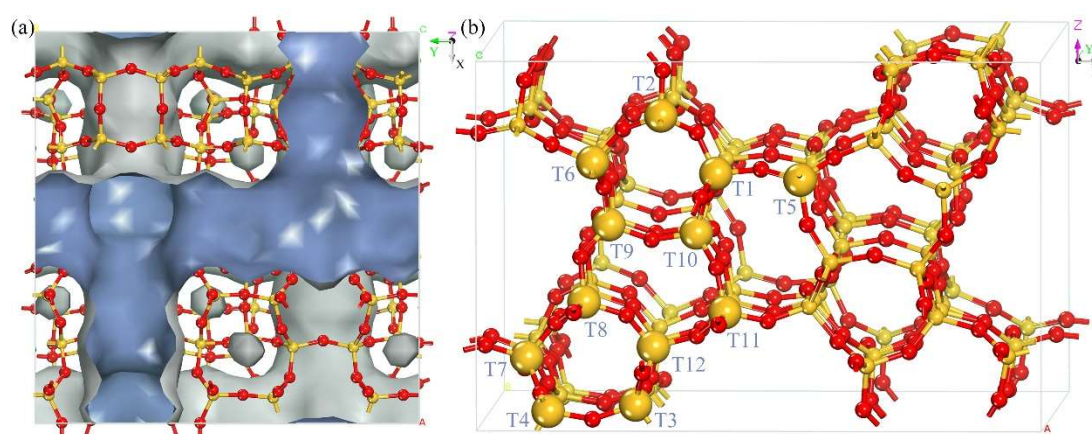

**Figure S9.** Unit cell structure of the orthorhombic MFI framework with intersectional straight and sinusoidal ten-membered-ring channels (a) and all 12 T sites (b). The X-axis direction represents the sinusoidal channels; the Y-axis direction represents the straight channels.

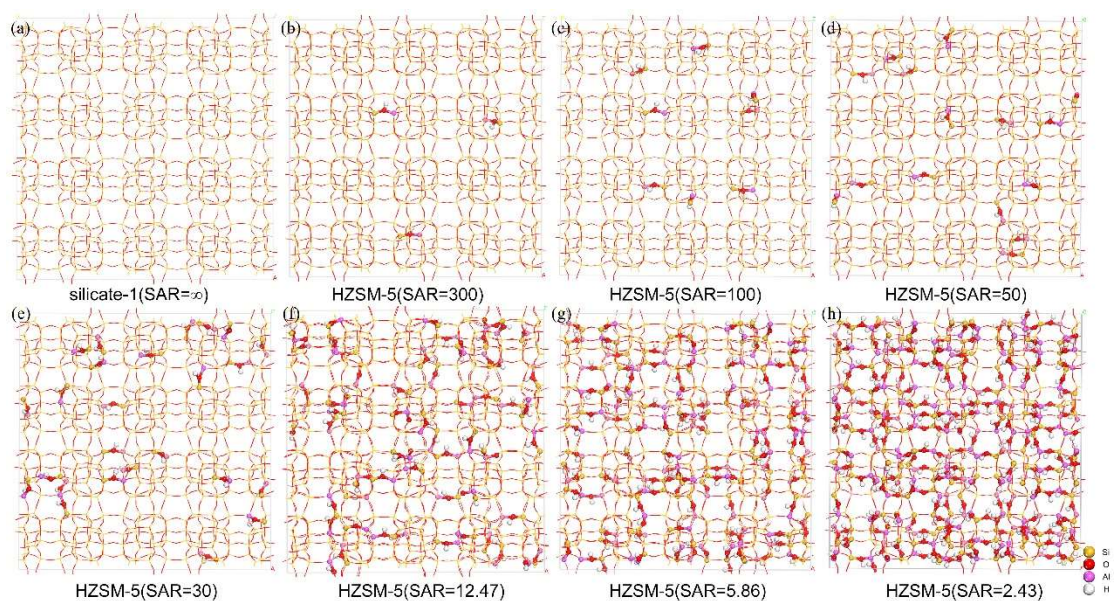

**Figure S10.** Optimized structures of silicate-1 (a) and HZSM-5 with different SAR of 300 (b), 100 (c), 50 (d), 30 (e), 12.47 (f), 5.86 (g) and 2.43 (h).

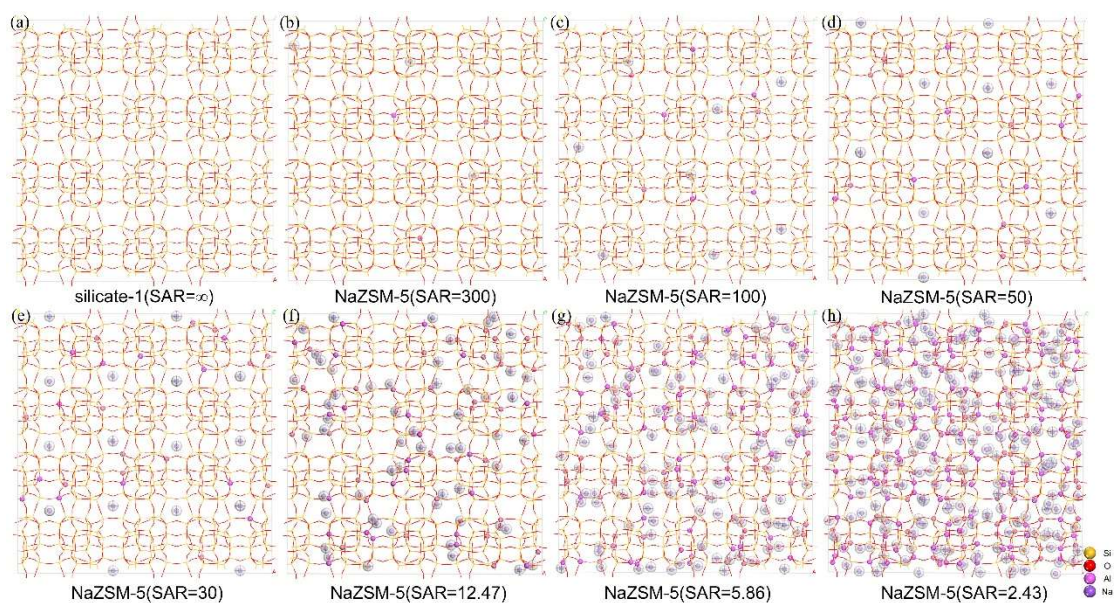

**Figure S11.** Optimized structures of silicate-1 (a) and NaZSM-5 with different SAR of 300 (b), 100 (c), 50 (d), 30 (e), 12.47 (f), 5.86 (g) and 2.43 (h).

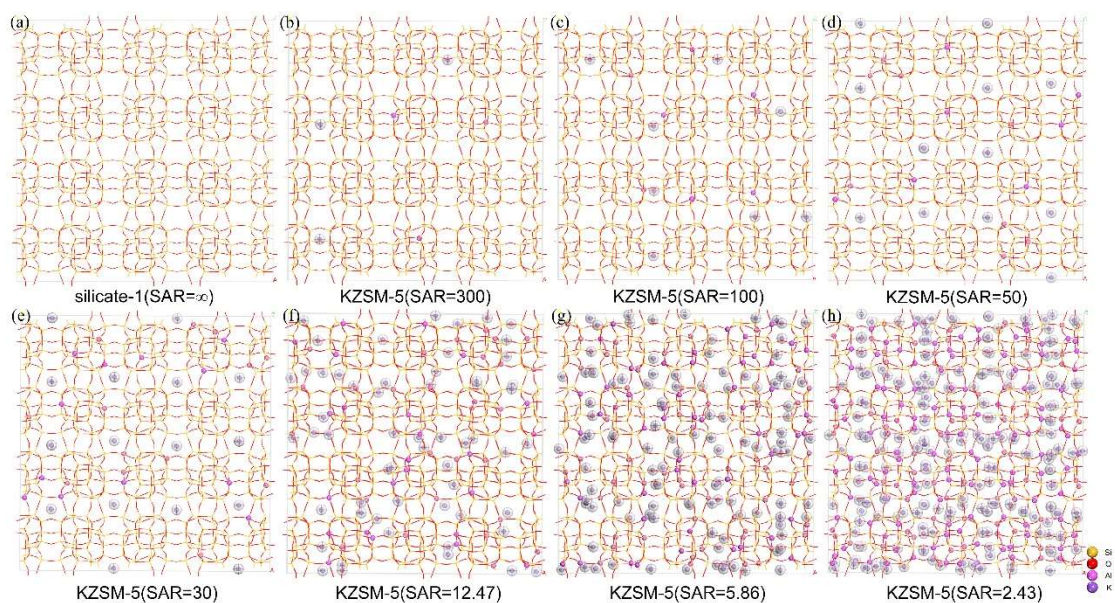

**Figure S12.** Optimized structures of silicate-1 (a) and KZSM-5 with different SAR of 300 (b), 100 (c), 50 (d), 30 (e), 12.47 (f), 5.86 (g) and 2.43 (h).

**Table S1.** The  $R^2$  values of linear fitting data of adsorption heats

| Zeolite/Temperature | 298K | 423K |
|---------------------|------|------|
| Silicate-1          | 0.94 | 0.98 |
| HMFI(300)           | 0.65 | 0.85 |
| HMFI(100)           | 0.90 | 0.83 |
| HMFI(50)            | 0.93 | 0.93 |
| HMFI(30)            | 0.97 | 0.98 |
